# Supplementary material for: Antiarrhythmic drug therapy and catheter ablation in patients with paroxysmal or persistent atrial fibrillation: a systematic review and meta-analysis
Source: PubMed Central journal article supplement (PMC11197351; doi:10.1186/s12872-024-03983-z), 2024-06-25

Supplementary Figures:

Supplementary Fig 1: Leave one test Recurrent Atrial Arrhythmia

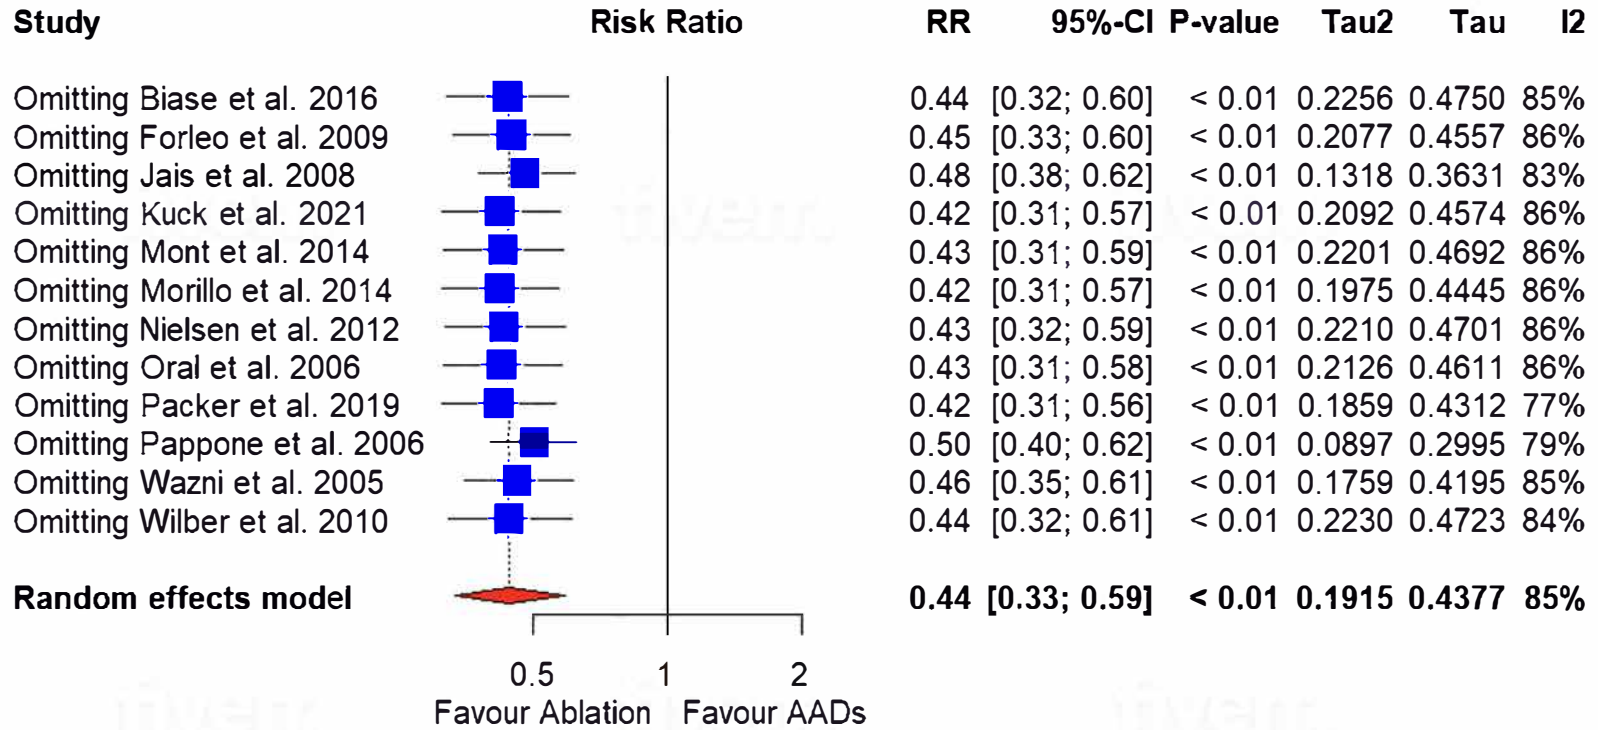

Supplementary Fig 2: Leave one test Recurrent Hospitalization

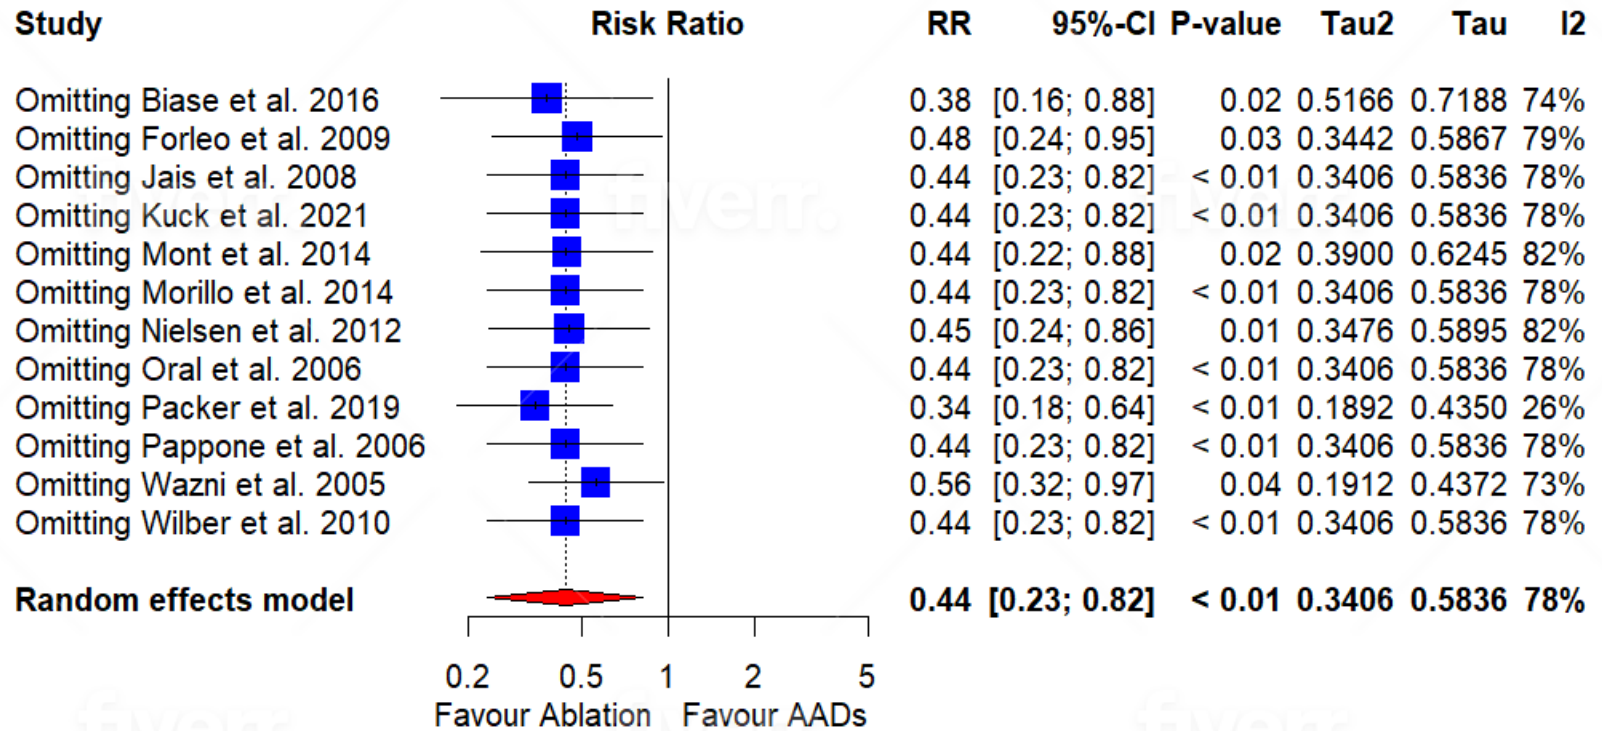

Supplementary Fig 3: Leave one test Change in SF-36-Physical Component

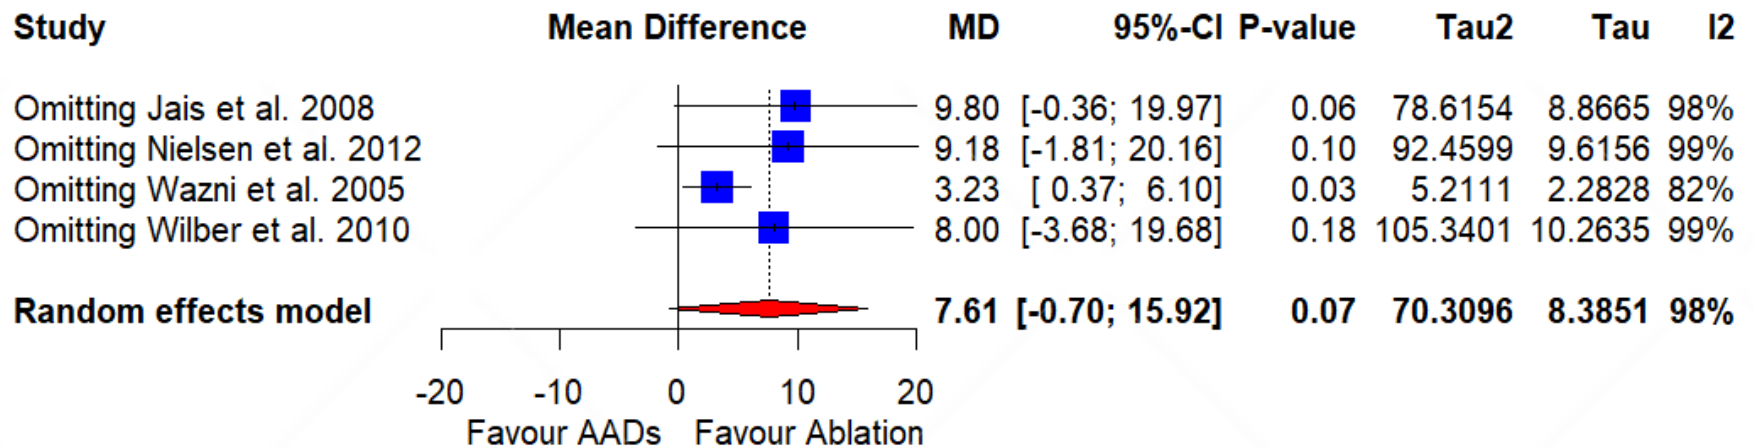

Supplementary Fig 4: Leave one test Change in SF-36 Mental Component

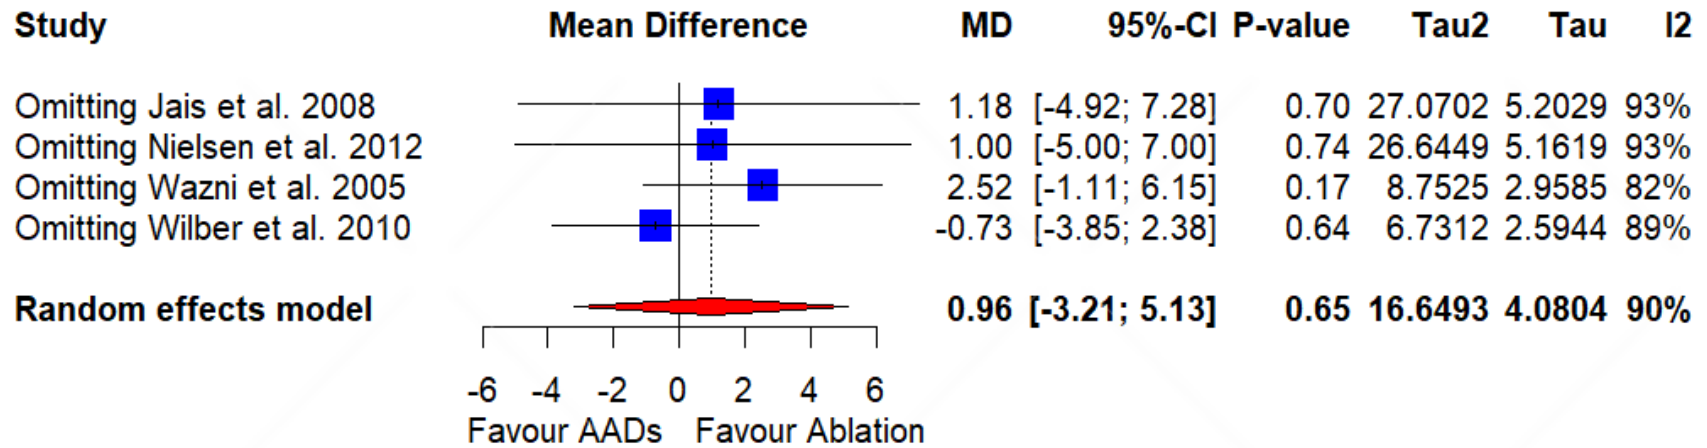

Supplementary Figure 5: Subgroup Analysis of Persistent AF and Paroxysmal AF

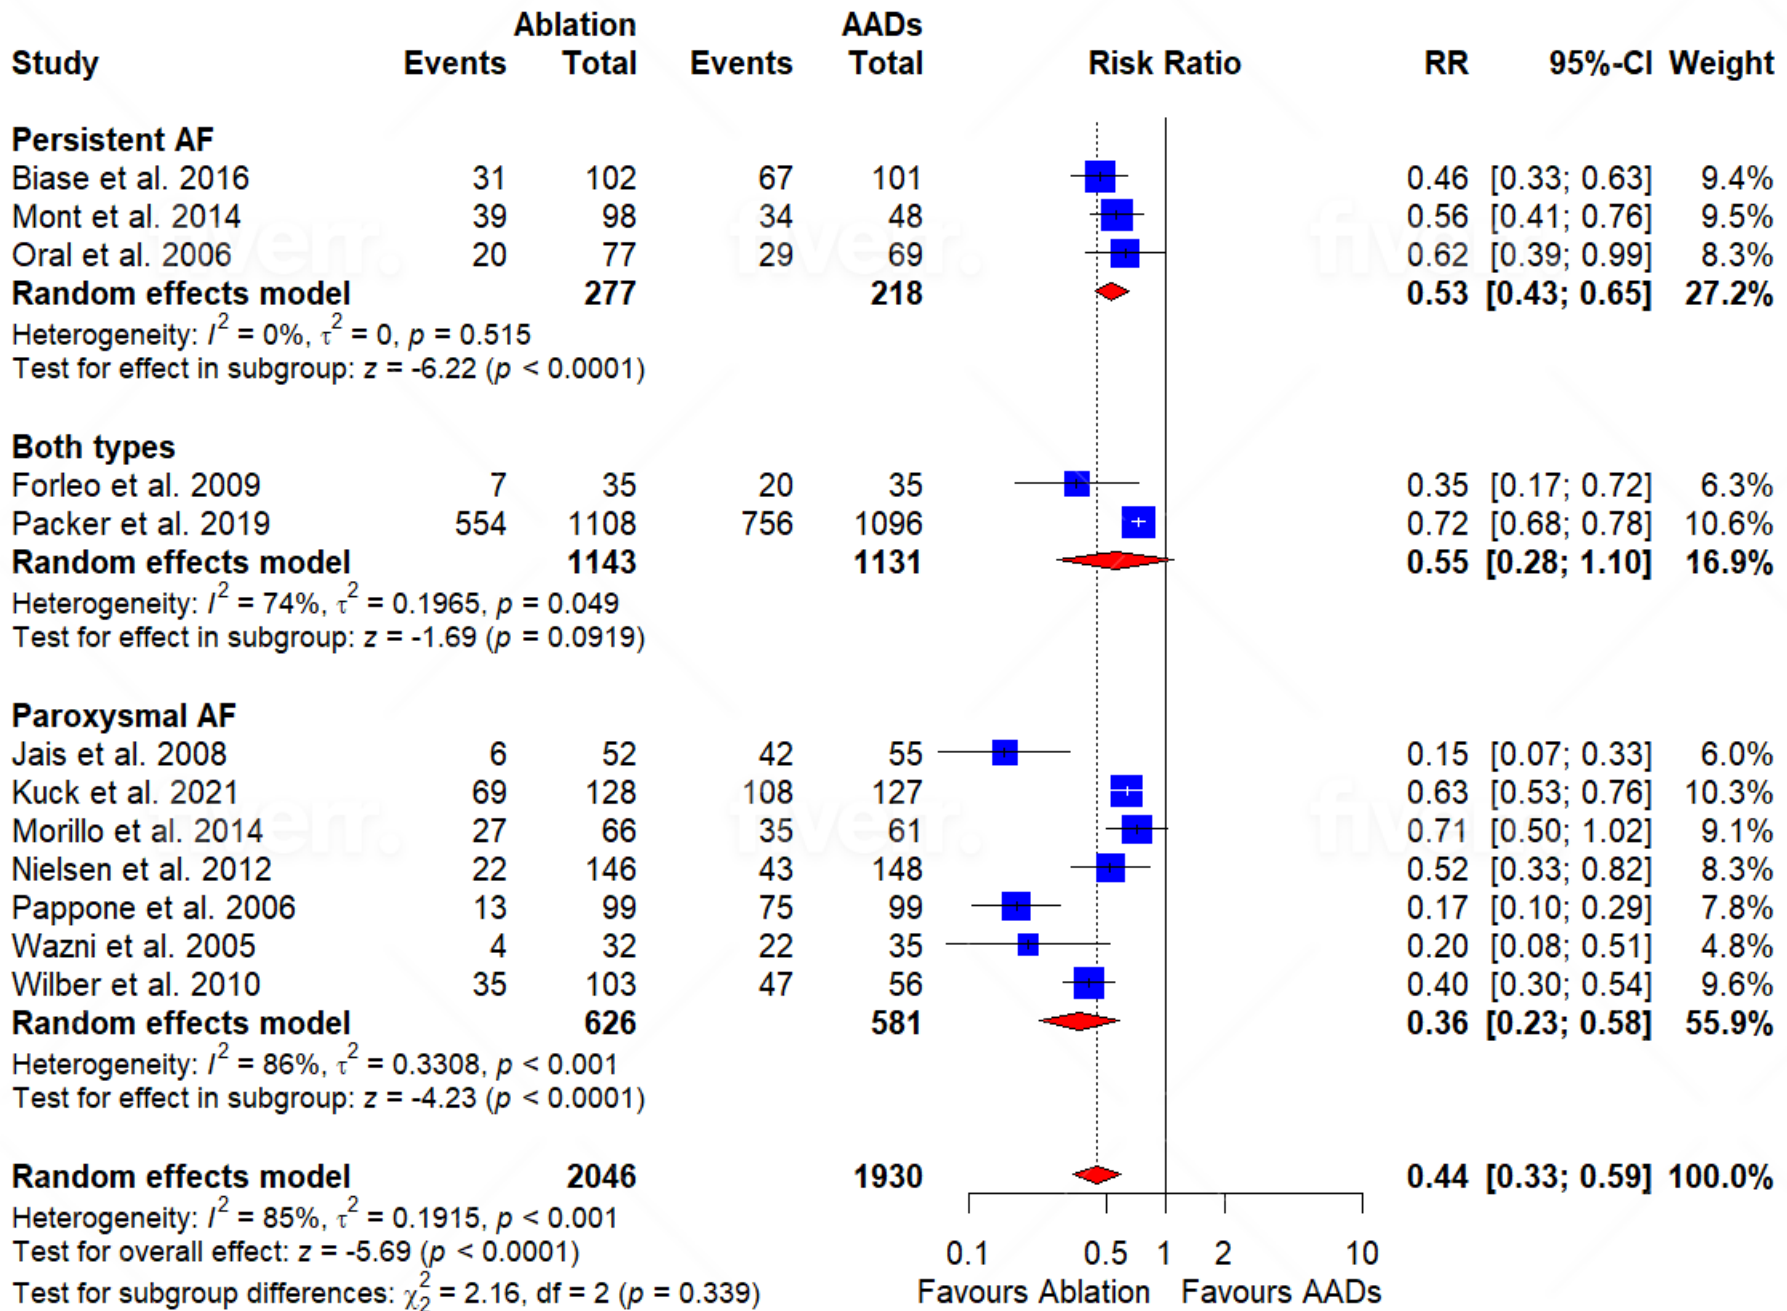

Supplementary Figure 6: Subgroup Analysis of Followup of 6-12 months and >12 months

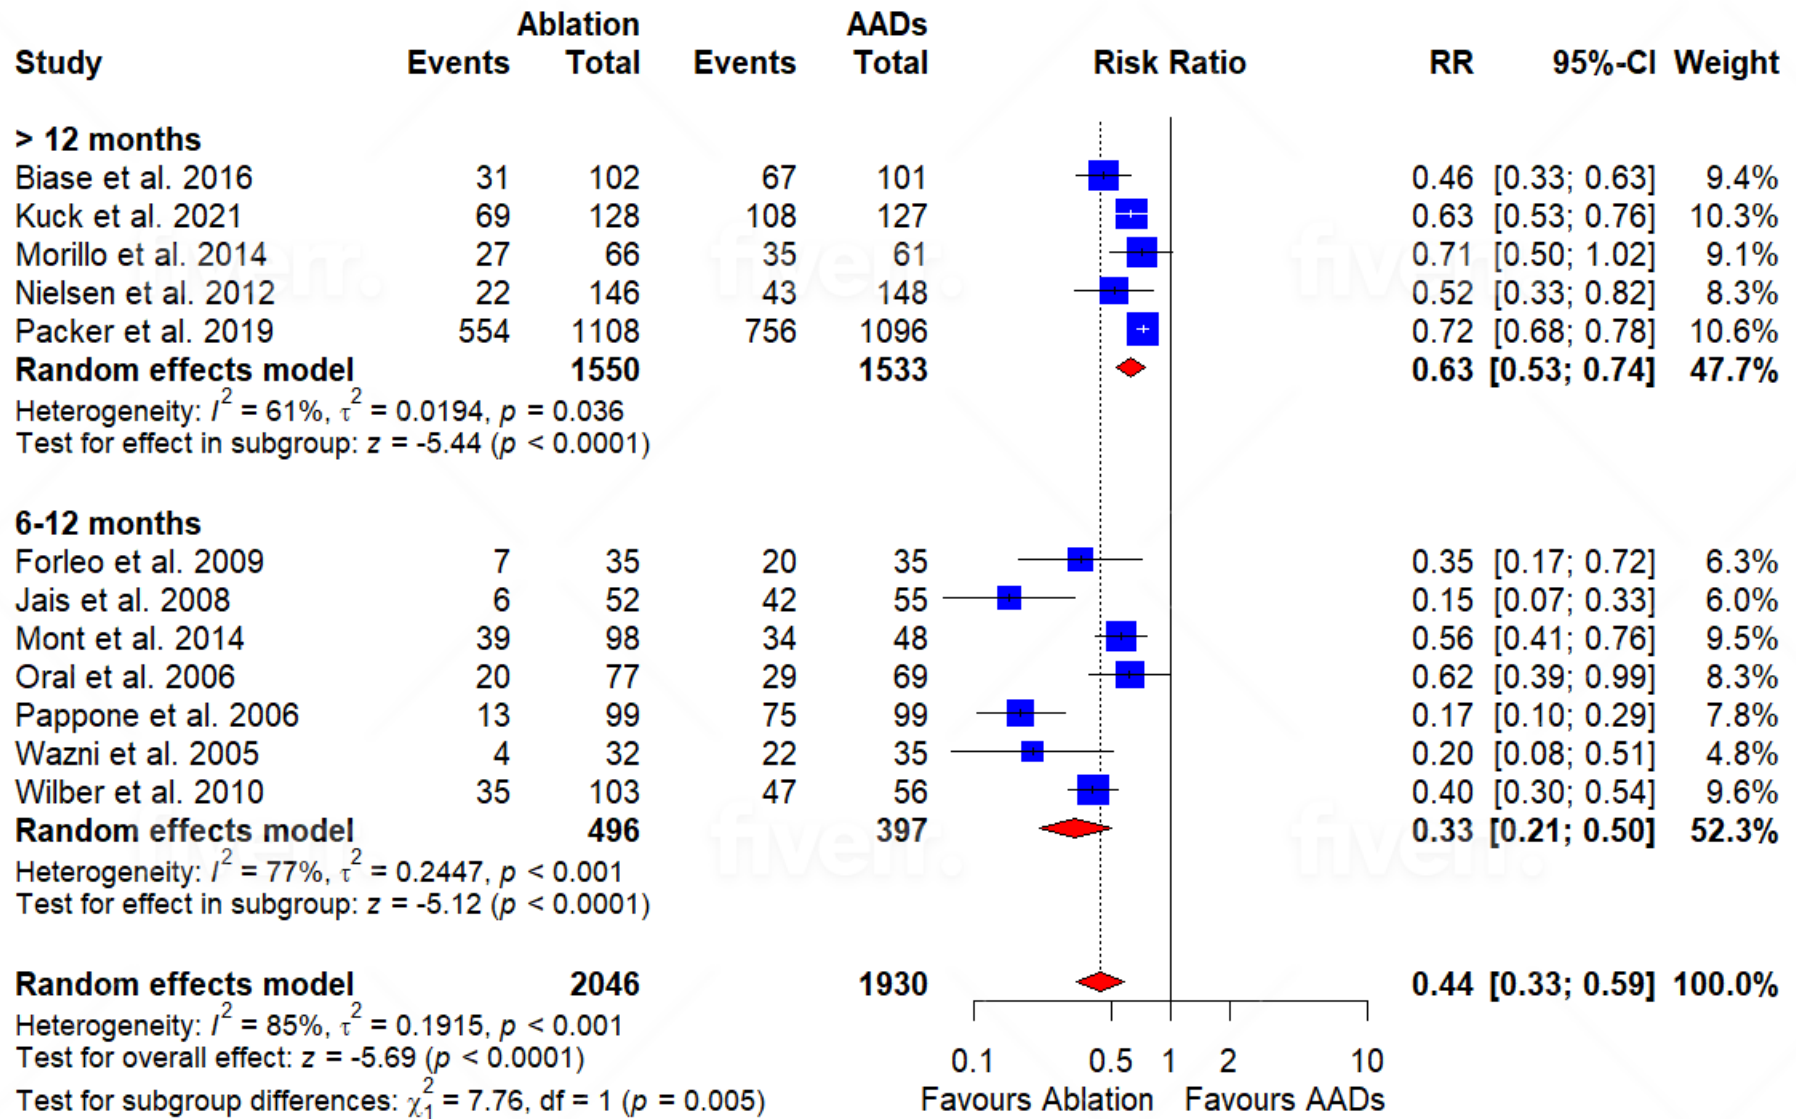

Supplement: 12872_2024_3983_MOESM1_ESM.pdf [file 12872_2024_3983_MOESM1_ESM.pdf]
